# Supplementary material for: Transition-metal decorated graphdiyne monolayer as an efficient sensor toward phosphide (PH3) and arsine (AsH3)
Source: Royal Society of Chemistry journal article supplement (doi:10.1039/d2cp02659g), 2022-01-01
Supplement: d2cp02659g1.pdf [file d2cp02659g1.pdf]

## Supporting Information

### Transition-Metals Decorated Graphdiyne Monolayer as Efficient Sensor toward Phosphide (PH<sub>3</sub>) and Arsine (AsH<sub>3</sub>)

S. Singesen,<sup>1,2</sup> N. Thasami,<sup>1,3</sup> P. Tangpakonsab,<sup>1,4</sup> H. Bae,<sup>5,6</sup> H. Lee,<sup>5</sup> T. Hussain,<sup>7</sup> T.  
Kaewmaraya<sup>1,3\*</sup>

<sup>1</sup>Department of Physics, Khon Kaen University, Khon Kaen, Thailand

<sup>2</sup>School of Physics, Institute of Science, Suranaree University of Technology, Nakhon Ratchasima 30000, Thailand

<sup>3</sup>Institute of Nanomaterials Research and Innovation for Energy (IN-RIE), NANOTEC-KKU RNN on Nanomaterials Research and Innovation for Energy, Khon Kaen University, Khon Kaen, 40002, Thailand

<sup>4</sup>Institute of Materials Chemistry, Technische Universität Wien, Getreidemarkt 9/BC/01, 1060 Vienna, Austria

<sup>5</sup>Department of Physics, Konkuk University, Seoul 05029, Republic of Korea

<sup>6</sup>Department of Condensed Matter Physics, Weizmann Institute of Science, Rehovot 7610001, Israel

<sup>7</sup>School of Science and Technology, University of New England, Armidale, New South Wales 2351, Australia

[thakaew@kku.ac.th](mailto:thakaew@kku.ac.th)

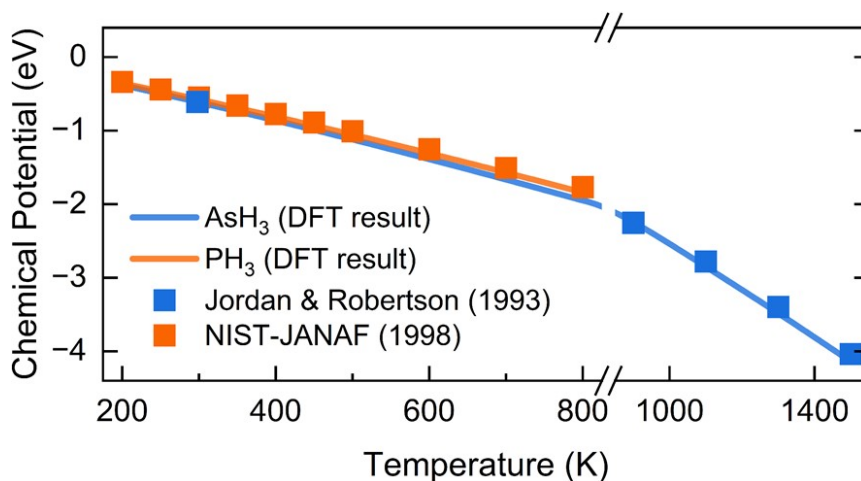

**Figure S1.** Chemical potential of AsH<sub>3</sub> and PH<sub>3</sub> molecules in the gas phase, calculated in  $\omega$ B97XD/aug-cc-pVTZ level of theory, and excerpted from experimental reports [1, 2].

### References

1. Chase, M.W. and N.I.S. Organization, *NIST-JANAF thermochemical tables*. Vol. 9. 1998: American Chemical Society Washington, DC.
2. Jordan, A. and A. Robertson, *Equilibrium gas-phase composition and thermodynamic properties including subhydrides in the pyrolysis of AsH<sub>3</sub> and PH<sub>3</sub>*. *Journal of crystal growth*, 1993. **128**(1-4): p. 488-493.
